# Supplementary material for: New insights into the chemistry of di- and trimetallic iron dithiolene derivatives. Structural, Mössbauer, magnetic, electrochemical and theoretical studies
Source: Royal Society of Chemistry journal article supplement (doi:10.1039/c4dt01462f), 2014-01-01
Supplement: c4dt01462f1.pdf [file c4dt01462f1.pdf]

# **ELECTRONIC SUPPLEMENTARY INFORMATION**

New insights into the Chemistry of Di- and Trimetallic  
Iron Dithiolene Derivatives. Structural, Mössbauer,  
Magnetic, Electrochemical and Theoretical Studies.

*Sonia Bruña, Isabel Cuadrado, Esther Delgado,\* Carlos J. Gómez-García, Diego  
Hernández, Elisa Hernández, Rosa Llusar, Avelino Martín, Nieves Menendez, Victor  
Polo, and Félix Zamora*

**Table S1.** Comparison between DFT optimized and X-ray selected geometries (distances in Å and angles in °).

|                   |                   | DFT (OPBE)  | X-Ray       |
|-------------------|-------------------|-------------|-------------|
| Compound <b>1</b> | Fe-Fe             | 2.468       | 2.480       |
|                   | Fe-S              | 2.241       | 2.254       |
|                   | C-S               | 1.778       | 1.758       |
|                   | C-C               | 1.396       | 1.427       |
| Compound <b>3</b> | Fe(1)-Fe(2)       | 2.675       | 2.715       |
|                   | Fe(2)-Fe(2)       | 3.142       | 3.219       |
|                   | Fe(1)-S           | 2.150       | 2.190       |
|                   | Fe(2)-S           | 2.302       | 2.305       |
|                   | C-S               | 1.767       | 1.778       |
|                   | C-C               | 1.400       | 1.402       |
|                   | Fe(2)-Fe(1)-Fe(3) | 72.0        | 72.7        |
|                   | Compound <b>4</b> | Fe(1)-Fe(2) | 2.504       |
| Fe(2)-Fe(3)       |                   | 2.524       | 2.565       |
| Fe(1)-S(4)        |                   | 2.237/2.235 | 2.263/2.252 |
| Fe(2)-S(4)        |                   | 2.208/2.206 | 2.241/2.235 |
| Fe(2)-S(6)        |                   | 2.177/2.184 | 2.215/2.215 |
| Fe(3)-S(6)        |                   | 2.215/2.216 | 2.238/2.237 |
| Fe(1)-C(18)       |                   | 2.472       | 2.576       |
| Fe(2)-C(18)       |                   | 1.721       | 1.764       |
| Fe(1)-Fe(2)-Fe(3) |                   | 155.0       | 151.7       |

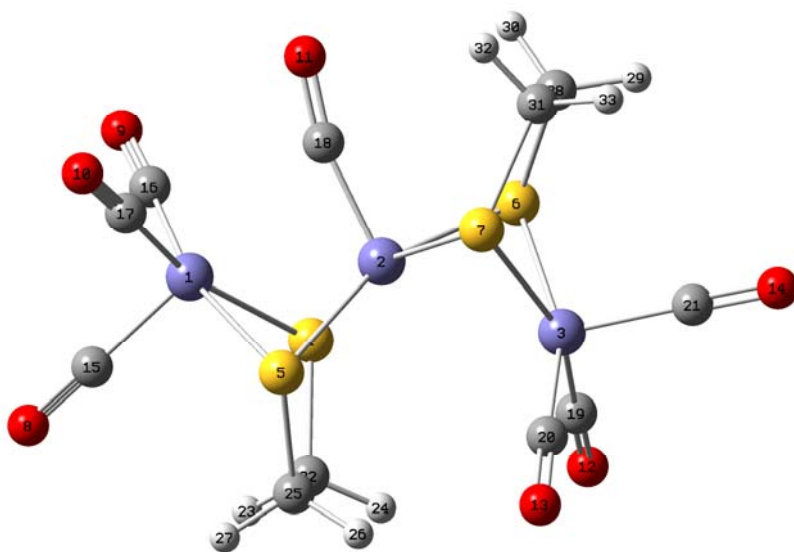

**Figure S1.** Atom labeling of structure **4**.

**Table S2.** List of Cartesian coordinates (in Å) of OPBE/TZP optimized structures **1**, **3** and **4**.

Compound **1**

|       |            |            |            |
|-------|------------|------------|------------|
| 1.C   | 1.660.665  | 0.697864   | -0.000519  |
| 2.C   | 1.660.748  | -0.697806  | 0.000231   |
| 3.C   | 2.857.919  | -1.400.800 | 0.001583   |
| 4.C   | 4.067.499  | -0.690658  | 0.001384   |
| 5.C   | 4.067.375  | 0.691311   | -0.000021  |
| 6.C   | 2.857.654  | 1.401.164  | -0.001214  |
| 7.H   | 5.005.980  | -1.239.424 | 0.002457   |
| 8.H   | 5.005.744  | 1.240.275  | -0.000046  |
| 9.Cl  | 2.896.145  | -3.121.833 | 0.003249   |
| 10.Cl | 2.895.489  | 3.122.209  | -0.002081  |
| 11.S  | 0.048563   | 1.447.998  | 0.000459   |
| 12.S  | 0.048692   | -1.448.264 | -0.001068  |
| 13.Fe | -1.136.220 | -0.000871  | 1.233.757  |
| 14.Fe | -1.136.263 | 0.000406   | -1.234.175 |
| 15.C  | -0.285183  | -0.000877  | -2.767.640 |
| 16.C  | -2.310.646 | 1.238.912  | -1.625.751 |
| 17.C  | -2.312.815 | -1.235.239 | -1.628.044 |
| 18.C  | -2.311.192 | -1.238.711 | 1.625.607  |
| 19.C  | -0.285331  | 0.000253   | 2.767.396  |
| 20.C  | -2.312.225 | 1.235.237  | 1.627.498  |
| 21.O  | 0.233079   | -0.003097  | -3.801.557 |
| 22.O  | -3.090.647 | 2.044.142  | -1.912.675 |
| 23.O  | -3.093.545 | 2.038.326  | 1.916.879  |
| 24.O  | 0.232559   | 0.002463   | 3.801.513  |
| 25.O  | -3.091.784 | -2.043.232 | 1.912.914  |
| 26.O  | -3.094.638 | -2.037.856 | -1.917.497 |

Compound 3

|       |            |           |            |
|-------|------------|-----------|------------|
| 1.C   | 2.250.847  | 2.045.872 | -1.334.903 |
| 2.C   | 2.958.424  | 3.232.855 | -1.566.101 |
| 3.C   | 4.327.817  | 3.189.164 | -1.813.248 |
| 4.H   | 4.867.447  | 4.113.619 | -2.000.206 |
| 5.C   | 4.999.711  | 1.973.865 | -1.817.854 |
| 6.H   | 6.068.897  | 1.940.345 | -2.008.700 |
| 7.C   | 4.309.169  | 0.789749  | -1.574.430 |
| 8.C   | 2.928.443  | 0.820500  | -1.337.998 |
| 9.C   | 0.000000   | 0.000000  | 1.152.207  |
| 10.C  | -1.788.932 | 0.670081  | -3.950.992 |
| 11.C  | -1.619.729 | 2.887.048 | -2.760.716 |
| 12.C  | 0.381746   | 1.920.644 | -3.934.103 |
| 13.Cl | 2.160.190  | 4.759.421 | -1.562.182 |
| 14.Cl | 5.177.224  | -0.698131 | -1.582.393 |

|       |            |            |            |
|-------|------------|------------|------------|
| 15.Fe | 0.000000   | 0.000000   | -0.552947  |
| 16.Fe | -0.758941  | 1.375.572  | -2.717.424 |
| 17.O  | 0.000000   | 0.000000   | 2.316.484  |
| 18.O  | -2.498.357 | 0.372890   | -4.814.313 |
| 19.O  | -2.190.610 | 3.889.184  | -2.836.788 |
| 20.O  | 1.010.403  | 2.391.785  | -4.782.451 |
| 21.S  | 0.529312   | 2.047.586  | -0.933342  |
| 22.S  | 2.016.587  | -0.638773  | -0.936094  |
| 23.C  | -2.250.847 | -2.045.872 | -1.334.903 |
| 24.C  | -2.958.424 | -3.232.855 | -1.566.101 |
| 25.C  | -4.327.817 | -3.189.164 | -1.813.248 |
| 26.H  | -4.867.447 | -4.113.619 | -2.000.206 |
| 27.C  | -4.999.711 | -1.973.865 | -1.817.854 |
| 28.H  | -6.068.897 | -1.940.345 | -2.008.700 |
| 29.C  | -4.309.169 | -0.789749  | -1.574.430 |
| 30.C  | -2.928.443 | -0.820500  | -1.337.998 |
| 31.C  | 1.788.932  | -0.670081  | -3.950.992 |
| 32.C  | 1.619.729  | -2.887.048 | -2.760.716 |
| 33.C  | -0.381746  | -1.920.644 | -3.934.103 |
| 34.Cl | -2.160.190 | -4.759.421 | -1.562.182 |
| 35.Cl | -5.177.224 | 0.698131   | -1.582.393 |
| 36.Fe | 0.758941   | -1.375.572 | -2.717.424 |
| 37.O  | 2.498.357  | -0.372890  | -4.814.313 |
| 38.O  | 2.190.610  | -3.889.184 | -2.836.788 |
| 39.O  | -1.010.403 | -2.391.785 | -4.782.451 |
| 40.S  | -0.529312  | -2.047.586 | -0.933342  |
| 41.S  | -2.016.587 | 0.638773   | -0.936094  |

Compound 4

|      |           |            |           |
|------|-----------|------------|-----------|
| 1.Fe | 4.012.096 | 1.856.235  | 2.253.319 |
| 2.Fe | 3.551.319 | 1.238.784  | 4.636.037 |
| 3.Fe | 3.502.967 | -0.307334  | 6.630.897 |
| 4.S  | 5.552.638 | 1.140.316  | 3.708.373 |
| 5.S  | 3.054.280 | -0.050649  | 2.916.833 |
| 6.S  | 4.254.298 | 1.776.292  | 6.625.705 |
| 7.S  | 1.748.337 | 0.729500   | 5.759.468 |
| 8.O  | 5.184.953 | 0.920074   | -0.226006 |
| 9.O  | 5.295.683 | 4.465.855  | 2.026.631 |
| 10.O | 1.565.195 | 2.753.870  | 0.940259  |
| 11.O | 2.539.220 | 3.910.020  | 4.316.445 |
| 12.O | 6.201.498 | -1.363.191 | 6.892.474 |
| 13.O | 2.552.562 | -2.887.592 | 5.678.843 |
| 14.O | 2.735.752 | -0.719070  | 9.402.759 |

|      |           |            |           |
|------|-----------|------------|-----------|
| 15.C | 4.722.738 | 1.278.752  | 0.773743  |
| 16.C | 4.776.973 | 3.441.657  | 2.154.252 |
| 17.C | 2.516.783 | 2.401.416  | 1.491.933 |
| 18.C | 2.999.313 | 2.830.719  | 4.287.066 |
| 19.C | 5.136.038 | -0.919391  | 6.768.104 |
| 20.C | 2.922.201 | -1.843.920 | 6.027.005 |
| 21.C | 3.033.888 | -0.535822  | 8.295.850 |
| 22.C | 5.762.840 | -0.590765  | 3.180.225 |
| 23.H | 6.485.560 | -0.580354  | 2.356.853 |
| 24.H | 6.224.242 | -1.111.893 | 4.024.164 |
| 25.C | 4.445.917 | -1.220.092 | 2.770.675 |
| 26.H | 4.185.892 | -2.076.959 | 3.398.433 |
| 27.H | 4.459.538 | -1.558.638 | 1.728.732 |
| 28.C | 2.857.151 | 2.684.334  | 7.373.349 |
| 29.H | 2.989.145 | 2.604.470  | 8.457.430 |
| 30.H | 2.984.512 | 3.734.004  | 7.088.534 |
| 31.C | 1.524.548 | 2.127.923  | 6.912.253 |
| 32.H | 0.930814  | 2.876.274  | 6.377.112 |
| 33.H | 0.923954  | 1.743.889  | 7.743.363 |

**Table S3.** Table of OPBE/TZP energies,  $\langle S^2 \rangle$  values and electron density at the Fe nucleus ( $\rho(0)$ ) employed for the calculation of Mossbauer isomer shift using the Universal fit parameters ( $\alpha = -0.287$ ,  $C = 0.594$  and  $A = 11820$ ) obtained by Noodleman.<sup>a</sup>

| Compound | bond energy (a.u.) | $\langle S^2 \rangle$ | $\rho(0)$   | $\rho(0)$   |
|----------|--------------------|-----------------------|-------------|-------------|
| <b>1</b> | -6.88928           | 0                     | 11821.61802 |             |
| <b>2</b> | -11.26037          | 2.47                  | 11821.43534 |             |
| <b>3</b> | -10.51134          | 0                     | 11821.43534 | 11821.23326 |
| <b>4</b> | -8.15066           | 0                     | 11821.66067 | 11821.11405 |

<sup>a</sup> G. M. Sandala, K. H. Hopmann, A. Ghosh, L. Noodleman, J. Chem. Theor. Comput. 2011, 7, 3232-3247.

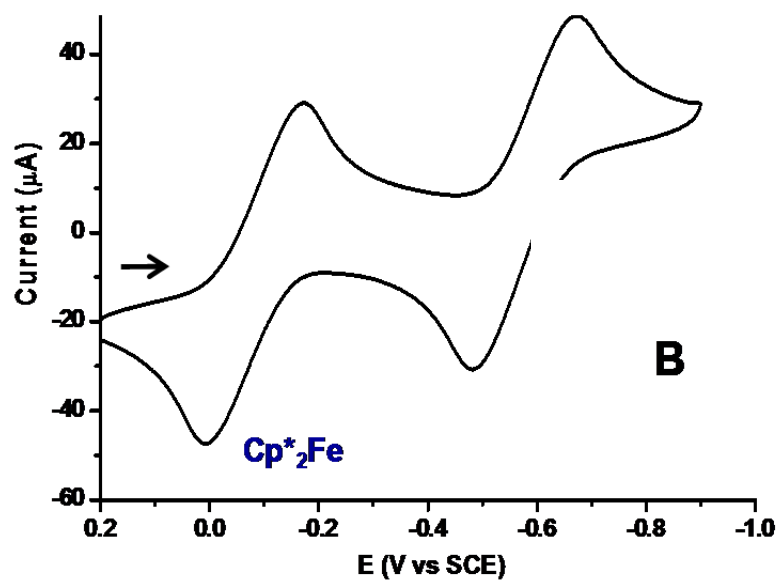

**Figure S2.** Cyclic voltammetric response, on glassy-carbon working electrode at a scan rate of  $0.1 \text{ V s}^{-1}$ , of trinuclear cluster  $[\text{Fe}_3(\text{CO})_7(\mu_3\text{-SC}_6\text{H}_2\text{Cl}_2\text{S})_2]$  (**3**) recorded in  $\text{CH}_2\text{Cl}_2$  containing  $0.1 \text{ M}$   $[n\text{-Bu}_4\text{N}][\text{PF}_6]$ , in the presence of  $\text{Cp}^*_2\text{Fe}$  added as an internal standard.

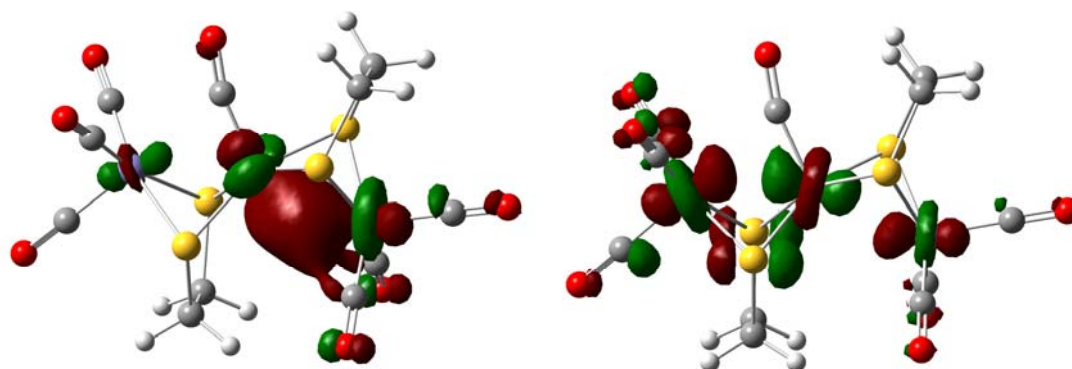

**Figure S3.** HOMO (left) and LUMO (right) orbitals of compound **4**.

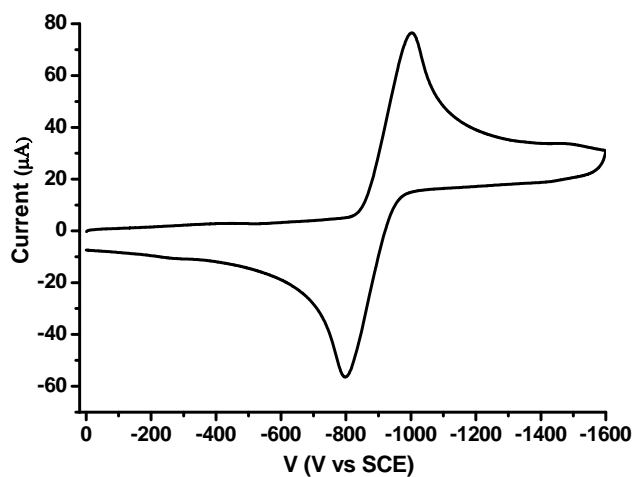

**Figure S4.** Cyclic voltammogram of bimetallic  $[\text{Fe}_2(\text{CO})_6(\mu\text{-SC}_6\text{H}_2\text{Cl}_2\text{S})]$  (**1**), recorded on glassy-carbon working electrode at a scan rate of  $0.1 \text{ V s}^{-1}$ , in  $\text{CH}_2\text{Cl}_2$  solution containing  $0.1 \text{ M}$   $[\text{n-Bu}_4\text{N}]$

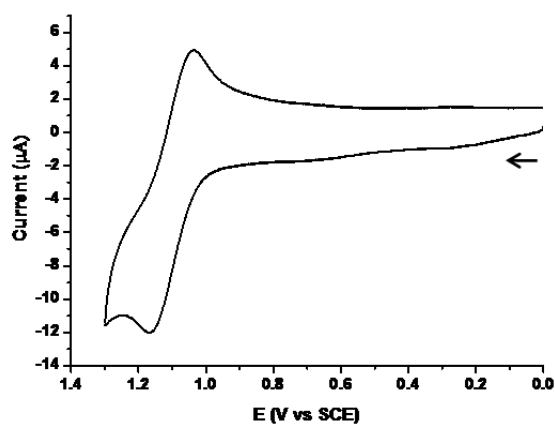

**Figure S5.** Cyclic voltammetric response, on glassy-carbon working electrode, of trinuclear cluster  $[\text{Fe}_3(\text{CO})_7(\mu_3\text{-SC}_6\text{H}_2\text{Cl}_2\text{S})_2]$  (**3**) in the anodic region, recorded in  $\text{CH}_2\text{Cl}_2$  containing  $0.1 \text{ M}$   $[\text{n-Bu}_4\text{N}][\text{PF}_6]$ . CVs are at a scan rate of  $0.1 \text{ V s}^{-1}$ .
